# Supplementary material for: Circular RNA CCDC66 promotes gastric cancer progression by regulating c-Myc and TGF-β signaling pathways
Source: PubMed Central journal article supplement (PMC7086271; doi:10.7150/jca.37718), 2020-02-20
Supplement: jcav11p2759s1.pdf [file jcav11p2759s1.pdf]

Supplementary Table 1. The association between circCCDC66 expression levels and the clinicopathological features.

| Features                             | Number | circCCDC66 expression |     | Mean±SD   | P value |
|--------------------------------------|--------|-----------------------|-----|-----------|---------|
|                                      |        | High                  | Low |           |         |
| <b>Gender</b>                        |        |                       |     |           |         |
| Male                                 | 47     | 32                    | 15  | 5.96±1.94 | 0.122   |
| Female                               | 23     | 11                    | 12  | 6.24±1.59 |         |
| <b>Age, years</b>                    |        |                       |     |           |         |
| <60                                  | 18     | 10                    | 8   | 6.50±2.24 | 0.584   |
| ≥60                                  | 52     | 33                    | 19  | 5.90±1.66 |         |
| <b>Tumor size (cm)</b>               |        |                       |     |           |         |
| <5                                   | 35     | 21                    | 14  | 5.73±1.74 | 1       |
| ≥5                                   | 35     | 22                    | 13  | 6.38±1.88 |         |
| <b>Differentiation</b>               |        |                       |     |           |         |
| Moderate                             | 29     | 17                    | 12  | 6.08±1.64 | 0.804   |
| Poor                                 | 41     | 26                    | 15  | 6.03±1.97 |         |
| <b>Lymphatic metastasis</b>          |        |                       |     |           |         |
| N0                                   | 18     | 6                     | 12  | 6.17±1.49 | 0.01    |
| N1-3                                 | 52     | 37                    | 15  | 6.01±1.94 |         |
| <b>Venous or Perineural invasion</b> |        |                       |     |           |         |
| Absent                               | 39     | 22                    | 17  | 5.90±1.64 | 0.459   |
| Present                              | 31     | 21                    | 10  | 6.24±2.05 |         |
| <b>Invasion depth</b>                |        |                       |     |           |         |
| T1 and T2                            | 5      | 3                     | 2   | 5.95±1.47 | 1       |
| T3 and T4                            | 65     | 40                    | 25  | 6.06±1.86 |         |
| <b>TNM stage</b>                     |        |                       |     |           |         |
| I and II                             | 19     | 7                     | 12  | 6.28±1.52 | 0.014   |
| III and IV                           | 51     | 36                    | 15  | 5.97±1.94 |         |
| <b>Tumor location</b>                |        |                       |     |           |         |
| Antrum                               | 14     | 8                     | 6   | 6.44±2.17 | 0.832   |
| Body                                 | 11     | 8                     | 3   | 6.44±1.61 |         |
| Angulus                              | 5      | 3                     | 2   | 4.51±1.41 |         |
| Cardia                               | 21     | 14                    | 7   | 6.10±1.71 |         |
| Others                               | 19     | 10                    | 9   | 5.89±1.83 |         |
| <b>CA199*</b>                        |        |                       |     |           |         |
| Normal                               | 49     | 30                    | 19  | 6.41±1.73 | 0.767   |
| Abnormal                             | 16     | 11                    | 5   | 5.29±1.98 |         |

\*indicates missing 5 cases.
